# Supplementary material for: Comparison of kinematics and electromyography in the last repetition during different maximum repetition sets in the barbell back squat
Source: PeerJ. 2024 Feb 1;12:e16865. doi: 10.7717/peerj.16865 (PMC10838531; doi:10.7717/peerj.16865)
Supplement: Supplemental Information 1 — This includes EMG, kinematics and anthropometrics. [file peerj-12-16865-s001.xlsx]

## Sheet: Raw Data
				Knee angle					Hip angle					Ankle angle					Trunk angle					Barbell velocity					Semitendinosus RMS					Erector Spinae RMS					Rectus femoris RMS					Vastus medialis RMS					Vastus lateralis RMS
V0
				1RM V0	3RM V0 Rep3	6RM V0 Rep6	10RM V0 Rep10		1RM V0	3RM V0 Rep3	6RM V0 Rep6	10RM V0 Rep10		1RM V0	3RM V0 Rep3	6RM V0 Rep6	10RM V0 Rep10		1RM V0	3RM V0 Rep3	6RM V0 Rep6	10RM V0 Rep10		1RM V0	3RM V0 Rep3	6RM V0 Rep6	10RM V0 Rep10		1RM- hele løftet	3RM V0 Rep3	6RM V0 Rep6	10RM- Hele løftet, hver rep		1RM- hele løftet	3RM V0 Rep3	6RM V0 Rep6	10RM- Hele løftet, hver rep		1RM- hele løftet	3RM V0 Rep3	6RM V0 Rep6	10RM- Hele løftet, hver rep		1RM- hele løftet	3RM V0 Rep3	6RM V0 Rep6	10RM- Hele løftet, hver rep		1RM- hele løftet
				122.809	122.005	116.339	118.053		-86.6581	-86.5172	-84.8312	-83.9914		-105.917	-107.519	-105.979	-107.204		-53.7998	-54.1353	-56.7871	-56.4481		0.00148	0.000994	0.004876	0.004751		60.5273		65.2151	67.207		131.815	160.931	147.121	127.81							541.643	239.06	525.252	450.449		704.015
				123.055	121.096	125.751	124.762		-92.3896	-97.7413	-101.05	-98.433		-117.321	-100.856	-98.8405	-94.0476		-60.2396	-63.782	-65.1932	-66.7646		0.004996	0.0019	0.003022	0.004255		19.7768	11.0425	16.9409	21.593		123.851	153.117	138.323	133.652		293.985	300.504	367.906	346.154		163.245	164.454	165.813	191.836		368.171
				118.897		121.013	119.644		-101.004		-102.754	-100.071		-120.211		-121.507	-121.96		-44.6419		-50.1772	0.938811		0.044427		0.004777	0.005959		74.5807	87.5489	92.5815	79.0996		179.126	151.305		109.402		261.908	259.428	300.628	258.818		242.103	255.58	294.161	250.913		292.204
				136.005	138.876	137.018	139.426		-87.2631	-87.4854	-87.7244	-87.7466		-113.675	-114.123	-114.52	-111.794		-47.0544	-46.2997	-48.2289	-47.4235		0.000706	0.010152	0.00819	0.019142		129.84	138.89		134.354		210.444	226.367	226.926	312.845		605.818	486.491	475.822	531.472		432.206	392.913	386.991	273.526		356.394
				118.53	114.386	114.607			-103.049	-102.316	-103.153			-113.215	-110.191	-110.247			-51.5508	-53.7087	-53.2844			0.000387	0.000509	0.00193			63.3984	86.4657	55.4487			355.376	362.46	389.328			679.229	602.871	594.365			82.8066	72.8069	87.4505			511.536
				131.669	130.409	130.062	130.587		-109.777	-109.592	-111.124	-111.849		-113.731	-112.182	-110.8	-110.642		-56.652	-58.5992	-58.5071	-59.759		0.000402	0.00292	0.008537	0.007075		49.8467		37.1757	45.7784		256.059		248.213	259.389		226.775		314.096			718.045		744.702	679.149		282.797
				123.654	124.951	119.33	125.136		-102.502	-102.131	-99.1884	-102.394		-107.477	-108.552	-105.711	-107.849		-56.8172	-55.8757	-59.6773	-59.0837		0.001208	0.010469	0.001444	0.004709		121.995	113.783	109.65	100.421		471.94	360.682	319.455	320.555		531.09	452.035	408.45	385.976		101.297	101.58	97.812	93.3207		336.743
				128.855	129.524	131.324	129.458		-105.49	-106.997	-108.229	-105.463		-113.819	-115.511	-114.606	-116.198		-41.7299	-44.3106	-42.0785	-43.2616		0.002906	0.003855	0.004441	0.00202		17.3644	15.9799	17.0642	11.0289		282.194	290.272	302.271	300.464		448.477	413.136	397.059	398.746		285.184	316.582	280.597	283.19		444.355
				121.017	125.555	128.379	127.293		-87.6486	-91.5762	-88.1086	-87.2508		-102.083	-102.169	-101.509	-103.853		-55.4865	-56.3827	-53.5893	-54.1561		0.002572	0.002463	0.013628	0.005794		36.4414	42.0869	38.7565	49.1212							264.517	294.886	280.733	236.481		577.144	449.828	22.6169	9.88858		216.388
				127.676	122.161	126.765	125.688		-70.531	-68.3191	-71.1414	-71.1022		-103.387	-99.8763	-101.568	-101.854		-50.0089	-51.0545	-51.512	-50.6365		0.002021	0.001619	0.003545	0.009658		107.236	77.7329	81.6929	61.3805							179.466	145.013	120.619	131.087		165.215	158.869	162.215	122.697		370.3
				106.205	109.407	109.915	103.024		-98.9157	-103.62	-70.0005	-99.3792			-104.153	-103.98	-101.866		-42.5804	-45.5397	-41.795	-49.276		4.3e-05	0.002879	0.001441	0.002303		132.304	119.872	120.967	128.964		245.138	256.593	257.903	216.139		239.291	200.121	225.626	193.045		167.821	143.75	161.689	149.609		52.6477
																													80.9945	79.1318	69.1603	72.87		248.692	251.285	263.025	271.64		218.136	209.743	184.169	186.441							322.892
				134.986	137.294	136.733	135.912		-115.239	-114.607	-116.144	-115.724		-111.392	-115.4	-112.184	-113.04		-45.6495	-47.3875	-48.3471	-51.7875		0.003063	0.003823	0.004878	0.010048		43.5841	59.763	42.9705	50.2929		220.412	239.264	224.005	208.36		551.656	647.643	674.127	567.055		79.292	72.9912	87.8558	76.5571		150.679
				Knee angle					Hip angle					Ankle angle					Trunk angle					Barbell velocity					Semitendinosus RMS					Erector Spinae RMS					Rectus femoris RMS					Vastus medialis RMS					Vastus lateralis RMS
VMAX1
				1RM Vmax1	3RM Vmax1 Rep3	6RM Vmax1 Rep6	10RM Vmax1 Rep10		1RM Vmax1	3RM Vmax1 Rep3	6RM Vmax1 Rep6	10RM Vmax1 Rep10		1RM Vmax1	3RM Vmax1 Rep3	6RM Vmax1 Rep6	10RM Vmax1 Rep10		1RM Vmax1	3RM Vmax1 Rep3	6RM Vmax1 Rep6	10RM Vmax1 Rep10		1RM Vmax1		6RM Vmax1 Rep6	10RM Vmax1 Rep10		1RM Vmax1	3RM Vmax1 Rep3	6RM- VMAX1	10RM- VMAX1		1RM Vmax1	3RM Vmax1 Rep3	6RM- VMAX1	10RM- VMAX1		1RM Vmax1	3RM Vmax1 Rep3	6RM- VMAX1	10RM- VMAX1		1RM Vmax1	3RM Vmax1 Rep3	6RM- VMAX1	10RM- VMAX1		1RM Vmax1
				111.266	110.201	104.01	104.077		-82.2003	-83.2395	-80.4527	-79.3195		-103.553	-104.149	-102.437	-103.156		-56.0208	-57.0087	-59.0892	-59.4717		0.252858	0.272067	0.260798	0.07612		124.71	449.355	36.1948	167.029		164.176	187.489	199.092	172.036							559.033	72.4334	630.988	565.719		768.534
				113.515	109.512	113.902	114.502		-84.8041	-85.9316	-90.7289	-90.1837		-116.172	-103.026	-97.505	-92.9209		-62.503	-64.6055	-67.2379	-68.8895		0.355291	0.387291	0.356547	0.097692		31.7318	11.0427	14.8483	22.101		196.804	180.952	152.592	171.718		366.547	384.492	452.921	316.048		224.945	172.39	195.227	195.15		404.691
				107.443		108.015	109.068		-93.6424		-94.0612	-93.3895		-117.166		-117.016	-118.194		-48.9466		-56.0771	-54.9475		0.253316		0.277679	0.087115		68.8342	74.6651	79.7633	50.663		191.968	182.912		141.576		323.457	336.61	279.062	210.644		384.075	430.566	352.906	366.231		370.816
				127.41	126.244	123.09	127.231		-86.004	-85.2874	-84.4193	-85.2608		-110.94	-109.901	-110.264	-108.603		-50.2182	-51.0557	-53.24	-51.9601		0.266048	0.383904	0.448531	0.151532		52.5185	22.7222		13.527		182.448	443.642	371.254	381.426		983.62	876.448	1024.18	1072.13		561.201	551.194	616.6	417.308		402.762
				108.315	102.232	107.363			-96.5837	-93.7736	-97.6536			-110.094	-106.957	-108.748			-54.7314	-57.0896	-55.0491			0.231667	0.242843	0.208933			35.9552	46.4849	33.8919			385.097	370.55	444.52			690.54	788.758	638.285			99.8843	91.5999	89.2967			720.063
				123.572	117.262	120.149	122.208		-104.49	-99.8136	-103.612	-105.076		-111.668	-109.883	-108.927	-109.614		-59.5452	-63.6867	-61.553	-61.689		0.288974	0.358005	0.341853	0.045438		12.9333		12.6014	14.6978		232.546		314.464	209.256		251.853		489.536			666.629		912.616	684.635		261.692
				112.455	115.553	110.799	114.628		-95.1254	-94.4196	-92.176	-94.2567		-103.452	-106.627	-104.088	-105.532		-60.4418	-58.1791	-61.1519	-61.3957		0.280999	0.296133	0.27317	0.091568		71.0667	92.1479	46.296	54.1963		574.22	437.938	366.212	361.479		541.645	454.321	453.873	497.634		98.878	95.6649	106.931	98.5537		346.475
				118.028	114.726	113.792	113.671		-98.4888	-95.1455	-96.0081	-94.1088		-110.92	-112.993	-110.871	-112.739		-44.3492	-46.7986	-45.5811	-46.7703		0.319716	0.383498	0.370783	0.167852		11.5561	12.2529	11.9632	11.9795		237.777	344.508	333.623	289.076		436.538	368.4	340.657	396.152		317.366	317.597	306.422	320.095		596.267
				103.983	110.87	115.367	114.848		-83.7608	-85.4044	-85.8281	-85.2026		-96.5174	-98.5712	-97.5831	-100.379		-62.264	-61.7292	-59.0969	-59.7626		0.21359	0.335525	0.414376	0.171759		10.4081	15.3515	18.5698	14.2631							341.646	410.975	416.087	349.043		730.474	436.378	26.5387	5.18505		321.474
				119.242	112.181	105.943	112.82		-68.7607	-68.9027	-67.2505	-68.4015		-100.378	-94.307	-94.8903	-97.1071		-54.3398	-55.5024	-58.068	-55.0031		0.301516	0.195466	0.33106	0.194015		60.3383	50.9845	29.8839	85.5451							193.997	141.93	138.365	172.938		189.258	143.768	223.338	163.02		394.744
				90.8322	97.8887	96.7469	91.3771		-90.0744	-95.5305	-58.6633	-90.2831			-100.093	-99.5617	-97.7798		-47.6678	-48.471	-44.1768	-51.2637		0.2138	0.237853	0.226945	0.112318		36.6609	26.043	25.7522	19.4628		259.727	226.726	280.751	259.569		335.494	270.22	354.004	269.901		223.158	212.719	158.709	181.971		67.9461
																													81.0033	74.8498	68.8119	82.8699		234.295	275.394	281.803	269.949		203.601	231.765	227.02	241.501							265.322
				122.696	123.513	125.589	123.598		-106.513	-105.22	-107.87	-105.197		-108.493	-110.712	-110.053	-110.833		-49.3262	-51.2882	-51.6383	-55.4069		0.386599	0.399824	0.402586	0.101267		11.5962	19.4133	12.0978	10.5523		203.865	210.735	278.802	194.773		549.866	679.208	944.088	764.671		63.4533	65.1713	67.459	58.7891		17.2934
				Knee angle					Hip angle					Ankle angle					Trunk angle					Barbell velocity					Semitendinosus RMS					Erector Spinae RMS					Rectus femoris RMS					Vastus medialis RMS					Vastus lateralis RMS
VMIN
				1RM Vmin	3RM Vmin Rep3	6RM Vmin Rep6	10RM Vmin Rep10		1RM Vmin	3RM Vmin Rep3	6RM Vmin Rep6	10RM Vmin Rep10		1RM Vmin	3RM Vmin Rep3	6RM Vmin Rep6	10RM Vmin Rep10		1RM Vmin	3RM Vmin Rep3	6RM Vmin Rep6	10RM Vmin Rep10		1RM Vmin	3RM Vmin Rep3	6RM Vmin Rep6	10RM Vmin Rep10		1RM Vmin	3RM Vmin Rep3	6RM- VMIN	10RM- VMIN		1RM Vmin	3RM Vmin Rep3	6RM- VMIN	10RM- VMIN		1RM Vmin	3RM Vmin Rep3	6RM- VMIN	10RM- VMIN		1RM Vmin	3RM Vmin Rep3	6RM- VMIN	10RM- VMIN		1RM Vmin
				82.2905	83.9164	78.6701	78.2482		-64.6299	-68.1462	-63.5909	-63.4126		-95.9713	-96.9263	-94.9932	-94.5567		-56.1559	-58.5985	-57.2361	-57.2907		0.119909	0.148866	0.113341	0.07612		49.1281		68.9977	25.7771		152.982	203.848	156.014	135.643							656.24	83.2549	610.165	504.018		797.76
				92.9095	86.8112	90.4946	92.4885		-69.3005	-69.3481	-74.6907	-74.8803		-111.575	-97.3174	-89.5162	-88.6289		-64.0679	-68.1723	-70.9877	-72.0873		0.125444	0.169583	0.078479	0.097692		8.77526	11.6856	19.0363	27.0169		137.863	181.99	150.304	151.608		373.505	373.535	431.496	441.291		174.116	186.305	207.341	256.395		449.26
				73.7282		69.1926	85.3473		-72.2143		-68.7124	-78.3675		-106.581		-105.412	-110.698		-48.3925		-60.5718	-61.2704		0.053315		0.115228	0.087115		89.3578	108.634	116.719	95.6346		166.486	178.725		119.981		339.351	333.237	400.802	311.114		297.604	320.265	400.087	322.269		337.031
				103.134	98.1202	88.8828	94.3224		-75.2997	-76.3637	-69.7953	-72.07		-105.71	-100.78	-99.6131	-101.19		-56.4409	-57.4354	-58.1796	-58.5009		0.100121	0.074964	0.183075	0.151532		135.233	90.0704	152.297	110.87		202.271	159.221	221.077	407.393		900.379	798.896	591.122	761.813		560.509	570.029	449.066	371.821		381.443
				82.9099	78.3696	77.4375			-78.8381	-76.6421	-77.2925			-103.224	-100.556	-99.519			-57.6702	-62.8313	-61.3462			0.053471	0.071978	0.056764			42.7904	52.1569	47.8204			336.157	379.135	392.642			937.76	736.889	769.41			90.1749	72.953	93.6373			571.498
				105.176	84.993	82.3296	86.2456		-93.0591	-75.0037	-73.2766	-76.2008		-106.166	-104.067	-103.548	-104.542		-64.1568	-64.4597	-56.3297	-62.0029		-0.028655	0.122689	0.011049	0.045438		14.8695		41.929	48.7029		277.476		261.082	269.593		288.216		331.886			730.01		797.917	682.273		281.925
				96.8759	93.6181	90.017	93.1082		-81.1336	-78.5741	-77.3847	-78.7136		-102.205	-100.922	-98.7024	-100.556		-56.5867	-61.7773	-60.9708	-61.5151		0.077145	0.077189	0.109362	0.091568		105.262	108.041	104.13	142.645		513.623	401.479	346.121	359.291		589.054	432.677	489.305	479.115		108.869	103.114	104.517	111.988		356.381
				83.8781	84.5422	80.0456	83.4026		-72.4151	-72.1013	-71.4145	-71.3822		-104.466	-106.343	-102.641	-105.766		-64.6064	-43.1003	-44.2551	-44.105		0.069941	0.109408	0.168652	0.167852		17.7232	17.319	17.0862	11.6798		310.814	336.739	343.231	339.244		397.788	387.487	389.611	361.245		271.564	343.97	311.394	302.656		464.476
				71.7782	64.1437	66.1042	74.9551		-58.5021	-57.3608	-63.4418	-68.0454		-90.034	-84.5094	-81.6482	-87.8584		-45.5204	-65.2276	-66.3917	-67.5399		0.064413	0.119276	0.130976	0.171759		39.9717	41.0067	36.2703	46.4069							336.839	409.805	358.942	317.394		626.685	595.53	26.3671	6.97068		246.332
				91.828	102.945	84.4468	82.3778		-54.7684	-63.8046	-52.9186	-49.022		-95.509	-93.5917	-92.5359	-92.3435		-57.1689	-56.6468	-58.9387	-54.9225		0.143274	-0.088657	0.17744	0.194015		107.981	106.415	72.932	83.5137							207.935	128.826	114.134	162.388		183.742	149.426	150.025	151.819		383.892
				67.2379	69.2526	75.024	64.9219		-74.2395	-75.6345	-41.0262	-68.0941			-89.2459	-93.4685	-91.21		-50.2318	-51.468	-46.4201	-49.0595		0.049139	0.093918	0.080477	0.112318		102.598	77.895	101.653	132.728		268.51	328.392	315.112	243.481		282.553	248.23	253.383	213.179		182.428	155.004	199.113	169.383		61.5612
																													97.0443	91.8695	80.3945	77.5894		238.668	250.364	248.6	276.164		239.133	292.036	215.777	240.299							327.557
				79.4934	77.8832	75.9435	72.0852		-74.926	-73.3569	-72.331	-70.2026		-95.6546	-95.1097	-94.0754	-92.2325		-52.6364	-55.2365	-54.3888	-60.9275		0.11446	0.075899	0.10517	0.101267		48.1266	60.3003	37.8522	46.1214		246.369	266.006	254.403	250.967		671.997	806.359	785.892	724.598		78.858	76.9233	95.4517	83.1145		144.438
				Knee angle					Hip angle					Ankle angle					Trunk angle					Barbell velocity					Semitendinosus RMS					Erector Spinae RMS					Rectus femoris RMS					Vastus medialis RMS					Vastus lateralis RMS
VMAX2
				1RM Vmax2	3RM Vmax2Rep3	6RM Vmax2Rep6	10RM Vmax2Rep10		1RM Vmax2	3RM Vmax2Rep3	6RM Vmax2Rep6	10RM Vmax2Rep10		1RM Vmax2	3RM Vmax2Rep3	6RM Vmax2Rep6	10RM Vmax2Rep10		1RM Vmax2	3RM Vmax2Rep3	6RM Vmax2Rep6	10RM Vmax2Rep10		1RM Vmax2	3RM Vmax2Rep3	6RM Vmax2Rep6	10RM Vmax2Rep10		1RM Vmax2	3RM Vmax2Rep3	6RM- VMAX2	10RM- VMAX2		1RM Vmax2	3RM Vmax2Rep3	6RM- VMAX2	10RM- VMAX2		1RM Vmax2	3RM Vmax2Rep3	6RM- VMAX2	10RM- VMAX2		1RM Vmax2	3RM Vmax2Rep3	6RM- VMAX2	10RM- VMAX2		1RM Vmax2
				54.3453	45.7247	44.4256	47.4495		-32.3445	-26.1279	-23.5226	-26.9167		-91.3753	-90.6952	-89.9439	-91.1672		-41.9345	-40.7185	-40.2725	-41.9823		0.352182	0.523485	0.440579	0.422771		27.5479		74.1619	25.6433		118.616	119.452	133.475	120.782							526.044	370.538	477.806	425.946		718.747
				52.3297	49.9016	50.1255	50.4779		-41.5536	-40.8419	-41.8094	-41.6814		-98.8945	-90.3719	-81.5342	-77.944		-54.1732	-55.0074	-54.7983	-55.658		0.476213	0.55171	0.483937	0.553593		21.2193	8.56158	18.2519	20.5516		126.471	148.96	150.79	130.766		359.225	275.988	386.114	346.378		207.442	170.922	166.192	172.918		390.733
				39.7232		37.9882	41.4922		-42.1105		-42.7032	-45.1675		-101.93		-100.799	-100.759		-35.5172		-38.886	-44.3169		0.282874		0.308828	0.222394		65.726	79.2785	77.8361	80.505		197.919	138.075		108.395		188.546	216.128	226.726	268.759		159.217	191.504	190.254	226.051		258.708
				39.3571	35.3539	40.4592	44.8152		-12.101	-7.31949	-13.2272	-19.4022		-91.7729	-90.894	-91.9734	-92.6371		-32.2192	-32.0614	-32.5665	-39.423		0.486982	0.475553	0.58212	0.507295		143.361	160.939	196.717	165.379		230.657	217.169	181.138	229.669		345.548	299.445	192.576	199.23		367.06	321.895	318.837	199.4		357.818
				41.3524	41.8052	43.9291			-45.0186	-45.756	-47.5788			-95.8458	-95.7062	-96.2353			-38.8351	-46.7146	-43.4661			0.665899	0.681276	0.571391			70.3778	107.604	58.063			370.386	371.66	396.816			552.446	475.934	478.231			78.9466	71.712	87.8614			453.25
				44.5155	45.6465	47.6198	50.2793		-42.1196	-44.9891	-44.9271	-45.0149		-95.6814	-94.8604	-96.9976	-99.3277		-43.508	-43.8849	-39.1508	-40.9289		0.584866	0.614862	0.636727	0.521778		60.8975		34.0514	48.8653		261.872		230.244	269.487		211.653		267.951			754.128		673.741	717.948		296.84
				48.1691	53.1849	57.6197	51.2533		-47.8799	-49.1912	-49.0926	-46.4232		-87.617	-91.1379	-94.6462	-91.3325		-41.8105	-38.4067	-42.3997	-40.3817		0.800392	0.81605	0.702917	0.699985		144.448	116.076	120.65	84.7745		446.032	335.399	315.53	322.536		528.894	507.221	372.586	326.84		103.377	111.02	101.283	93.383		344.867
				48.4445	44.2069	44.6476	45.4092		-43.4332	-42.7428	-44.0607	-43.3662		-97.886	-95.4793	-95.1625	-96.718		-32.5874	-32.865	-32.1271	-32.5675		0.683723	0.636924	0.648624	0.627826		19.405	16.31	20.1172	10.8181		279.487	246.245	275.589	300.241		532.444	483.294	471.992	473.795		308.178	321.355	270.322	283.376		401.205
				27.2102	36.057	36.5252	26.6795		-9.55019	-21.1475	-27.6381	-15.7301		-81.1858	-81.804	-78.7498	-79.2009		-44.3259	-48.2773	-50.7028	-47.2753		0.350443	0.349621	0.406906	0.391069		38.1425	51.879	48.5557	61.8075							133.595	148.779	178.272	125.576		549.23	382.704	20.7973	6.99292		164.044
				53.8026	48.4121	46.7806	47.8169		-14.9196	-2.9357	-10.866	-10.2293		-89.4549	-91.5221	-86.1882	-87.2965		-39.8547	-34.0659	-41.5958	-35.9289		0.644	0.536998	0.661244	0.539536		127.531	78.5953	101.489	43.5298							177.685	164.65	129.41	112.149		160.999	178.207	157.582	104.032		393.44
				37.786	34.8729	33.9528	37.9428		-41.9545	-43.8397	-6.20116	-43.4125		-84.2323	-84.5721	-87.2972	-87.6175		-32.0443	-33.0177	-27.0955	-32.2444		0.57972	0.662245	0.662349	0.640641		158.916	156.819	144.534	155.769		241.911	209.945	231.559	182.794		199.157	147.362	181.931	145.237		153.495	125.425	148.714	123.81		45.6578
																													64.1481	84.3269	67.8507	71.9291		252.028	243.5	278.154	267.376		225.291	202.352	162.861	156.155							354.114
				31.8591	34.6164	33.428	27.9161		-41.4436	-38.9654	-38.7223	-35.6301			-83.2759	-81.7111	-79.2506		-36.592	-39.1403	-38.9637	-45.4422		0.733951	0.715676	0.74684	0.635867		46.6013	65.8835	54.6549	60.3462		209.82	228.108	183.83	183.819		371.354	475.808	465.487	392.446		87.5521	73.1842	88.5755	78.825		166.179
[truncated: 23 more columns]

## Sheet: Antrophometrics
Age	Height	Weight	1RM kg	3RM kg	6RM kg	10RM kg
24	183.1	89.2	113.5	105	90	80
27	186	94	135	117.5	110	100
27	181.2	67	110	100	95	82.5
23	178	68.8	100	92.5	75	72.5
24	181	83
23	175	80.6	127.5	117.5	110	100
22	183	79	115	105	95	85
22	171.5	91.5	145	130	115	110
22	186.5	83.5	105	90	82.5	77.5
25	195	92	130	120	110	95
22	172.5	75.8	120	112.5	107	97.5
22	180	82.4	150	135	125	115
